# Supplementary material
Source: PubMed Central journal article supplement (PMC7541396)
Supplement: NIHMS1581032-supplement-1581032_SuppFigures1-7.pdf [file NIHMS1581032-supplement-1581032_SuppFigures1-7.pdf]

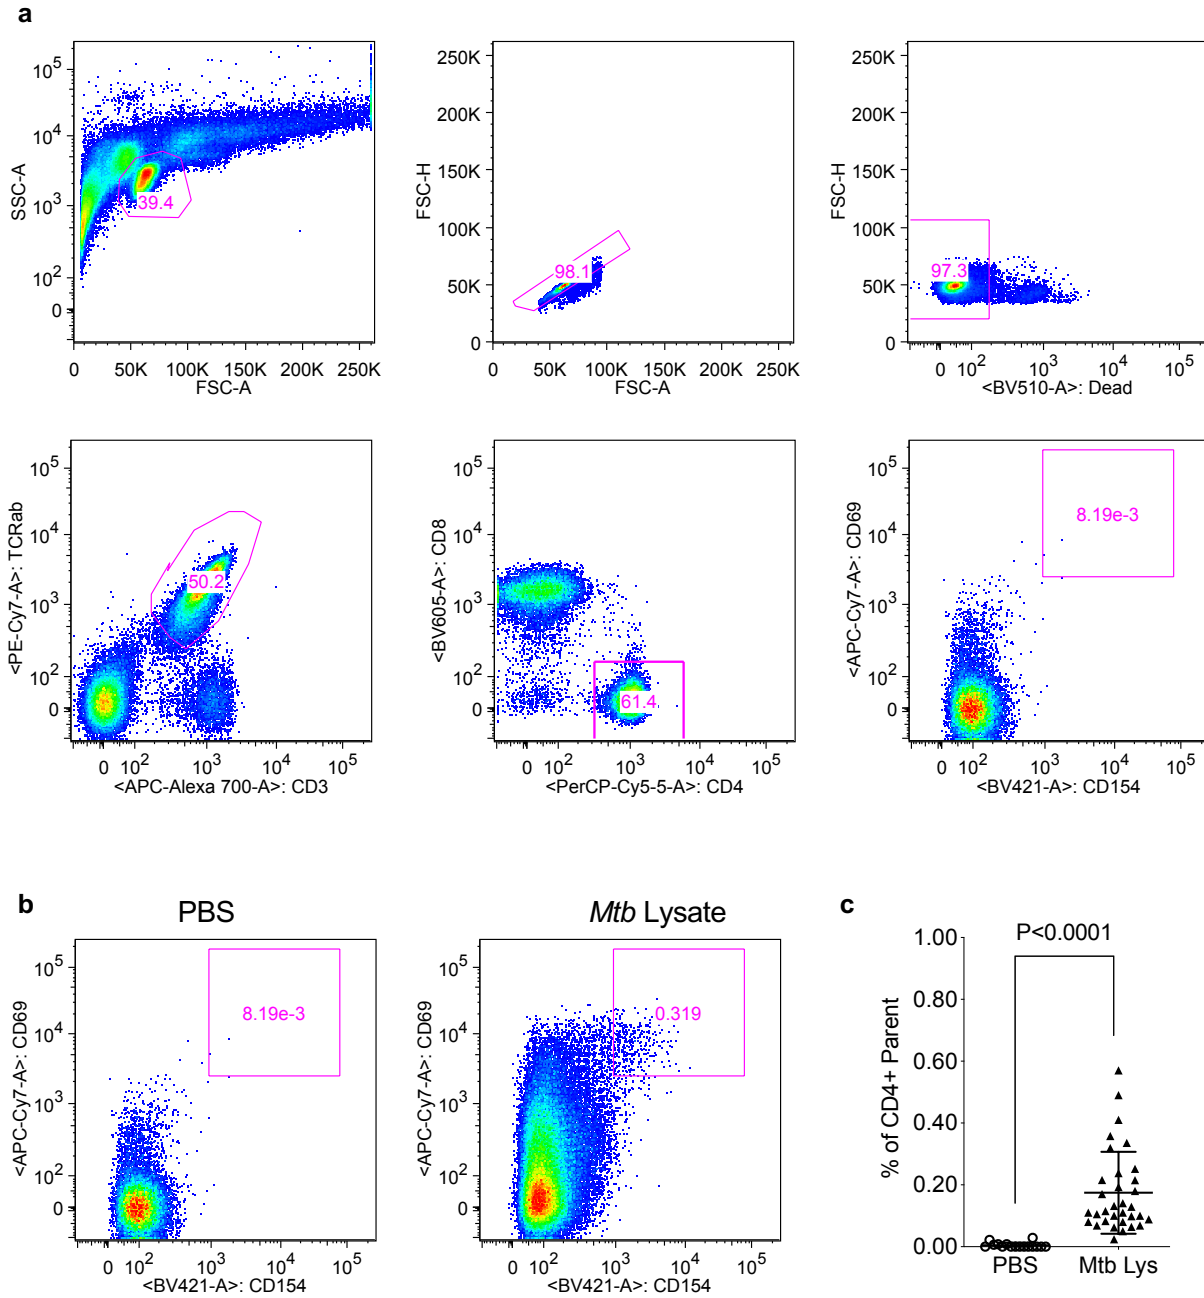

**Supplementary Figure 1. Stimulation of PBMC with *Mtb* Lysate.** **a**, Gating strategy used for isolating and sorting *Mtb*-reactive CD4<sup>+</sup> T cells after 12-hour *Mtb* lysate stimulation. **b**, The frequency increase of CD4<sup>+</sup>CD69<sup>+</sup>CD154<sup>+</sup> population after *Mtb* lysate stimulation. Plots shown as representative of two independent experiments. **c**, Frequency of CD4<sup>+</sup>CD69<sup>+</sup>CD154<sup>+</sup> population as a proportion of the CD4<sup>+</sup> T cells from PBS (n=16) and *Mtb* lysate stimulation (n=24). Mean  $\pm$  s.d. shown. P value calculated by two-sided paired Wilcoxon test.

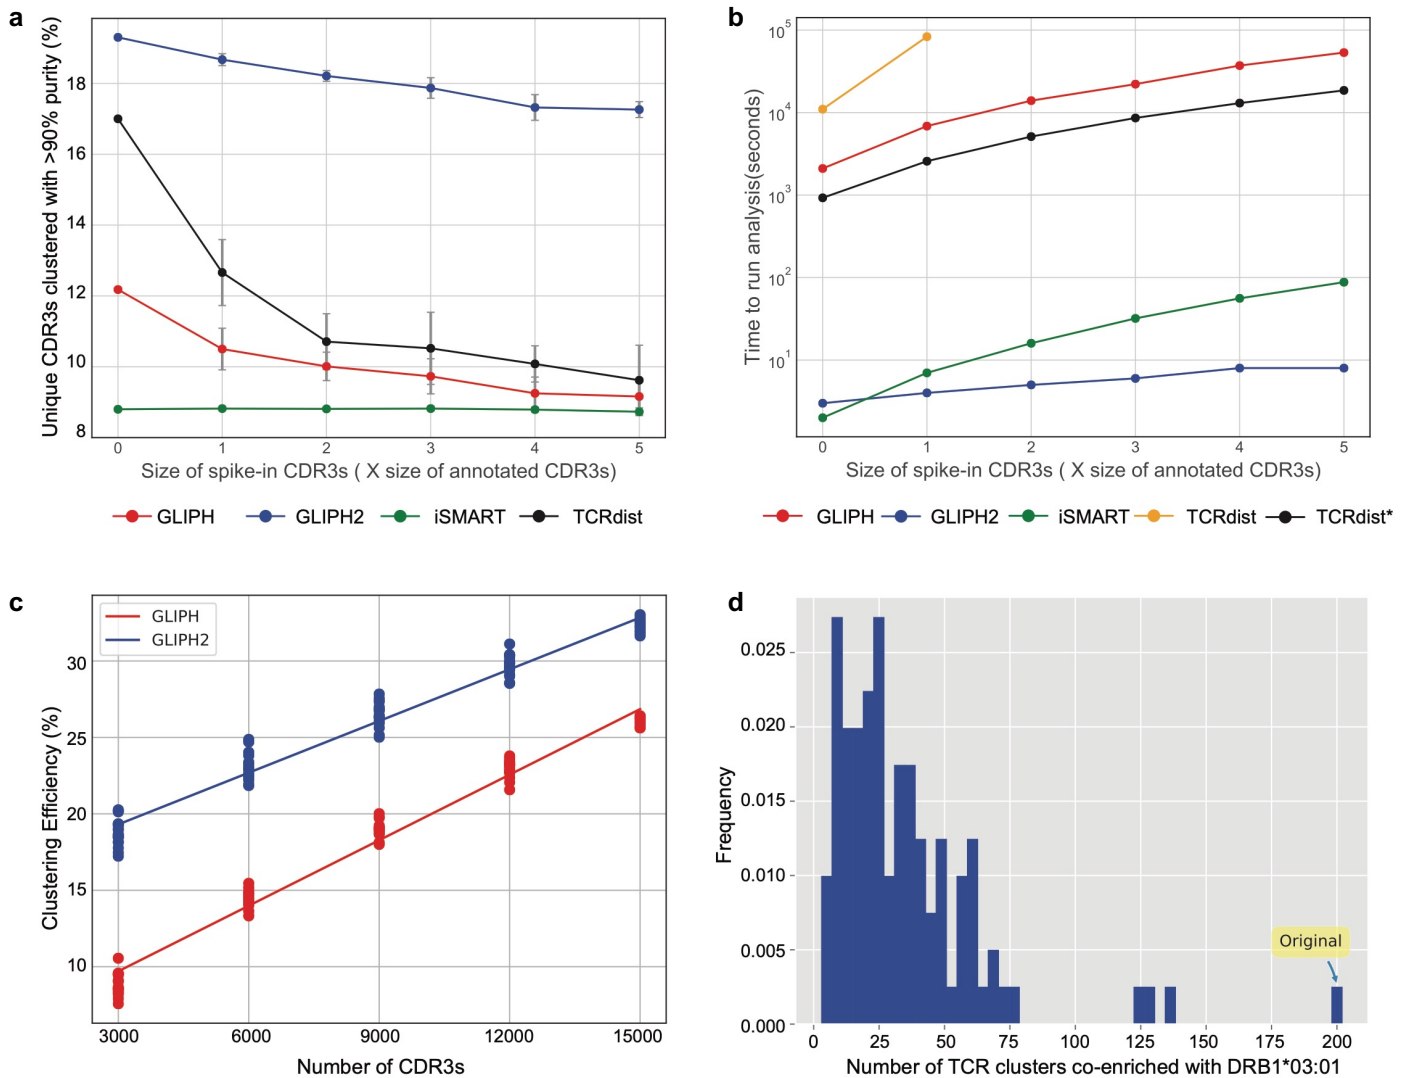

**Supplementary Figure 2. Benchmark of GLIPH2.** **a-b**, Performance comparison among GLIPH, GLIPH2, TCRdist (star indicates a modified code for clustering analysis only) and iSMART. 3264 unique CDR3 $\beta$  sequences from 15 epitopes were compiled from VDJdb (Supplementary Table 2). X-axis indicates the amount of spike-in data randomly selected from a CD4<sup>+</sup> T cell reference database, 0: no spike-in, 1-5: different fold of spike-in data were mixed with annotated CDR3 $\beta$  sequences. **a**, Y-axis indicates the percentage of correctly clustered unique CDR3 $\beta$  sequences. Clusters with more than 90% CDR3 $\beta$  sequences labeled with one correct epitope are considered correct clusters. s.d of 10 repeat random samples of spike-in reported on bars. **b**, Y-axis indicates the amount of time needed to run each algorithm. TCRdist indicates the whole package analysis while TCRdist\* indicates the clustering analysis only. **c**, Analyzing the 19,044 *Mtb*-specific CDR3 $\beta$  sequences, GLIPH2 clusters up to 32% of *Mtb* reactive TCRs while the original GLIPH clusters 26% of *Mtb* reactive TCRs. **d**, The histogram shows the distribution of number of TCR clusters co-enriched with DRB1\*03:01 after 100-time permutations of HLA information among all the individuals. The original number is highlighted with an arrow.

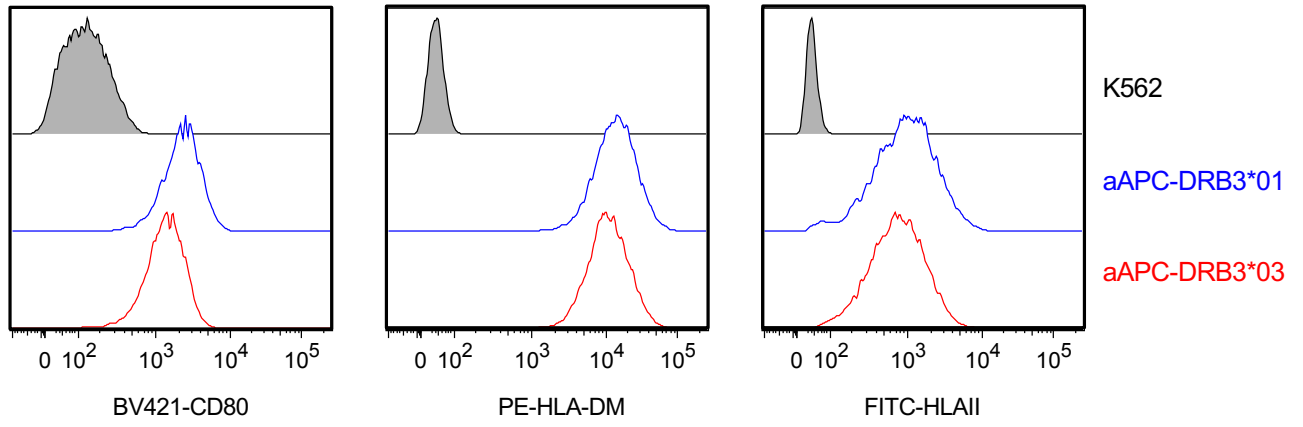

**Supplementary Figure 3. Generation of aAPC using K562.** Expression analysis of surface molecules on generated aAPC (artificial antigen presenting cell). Filled histograms: K562 cells as baseline control, colored histograms: respective aAPC. Plots shown as representative of two independent experiments.

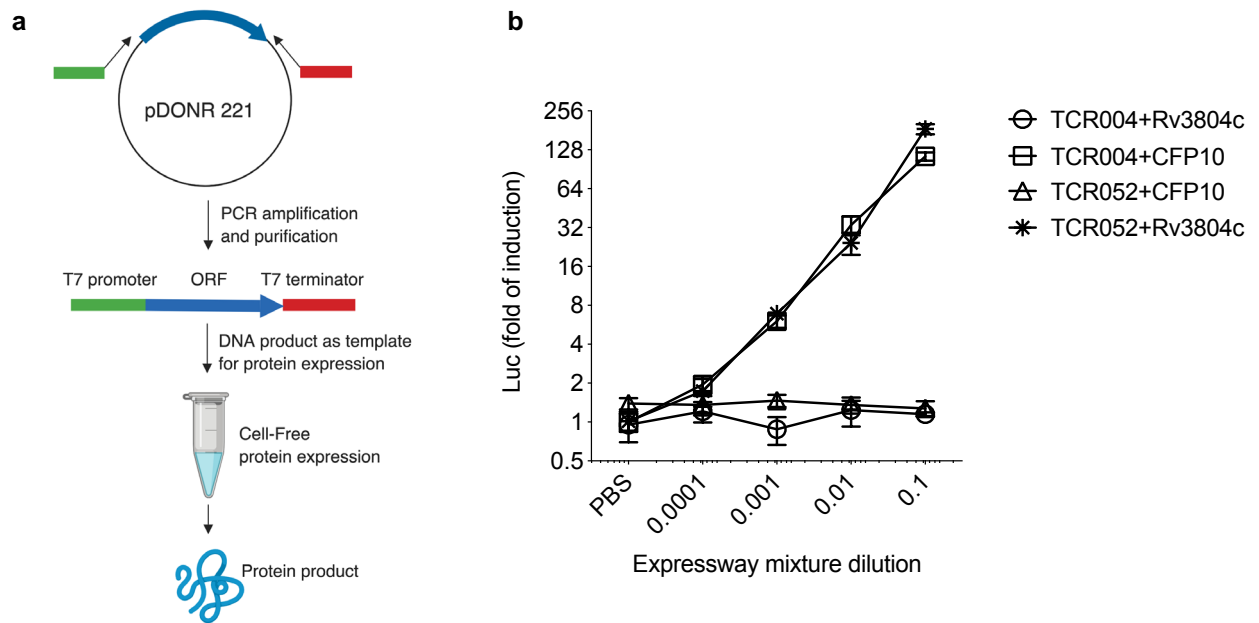

**Supplementary Figure 4. *In vitro* cell-free protein expression as antigen source for TCR activation.** **a**, A schematic depicting the workflow of cell-free protein expression. Briefly, individual ORF in vector pDONR 221 was PCR amplified using a pair of primers containing T7 promoter and terminator on each end. PCR product was then purified and used as template for protein expression using Expressway system in a single tube. The reaction mixture with protein product could be used immediately to activate its corresponding TCR without further purification. **b**, Protein CFP10 and Rv3804c were produced *in vitro* as described in **a**. TCR004 was activated by its target protein CFP10 but not by an unrelated protein Rv3804c. Similarly, TCR052 only activated by its target protein Rv3804c, but not by CFP10. x-axis indicates the titration of protein product. Mean  $\pm$  s.d. (n=3, biological replicates) shown.

|   | PL1  | PL2  | PL3  | PL4  | PL5  | PL6  | PL7  | PL8  | PL9  | PL10  | PL11  | PL12  |
|---|------|------|------|------|------|------|------|------|------|-------|-------|-------|
| A | PL1A | PL2A | PL3A | PL4A | PL5A | PL6A | PL7A | PL8A | PL9A | PL10A | PL11A | PL12A |
| B | PL1B | PL2B | PL3B | PL4B | PL5B | PL6B | PL7B | PL8B | PL9B |       | PL11B | PL12B |
| C | PL1C | PL2C | PL3C | PL4C | PL5C | PL6C | PL7C | PL8C | PL9C |       | PL11C | PL12C |
| D | PL1D | PL2D | PL3D | PL4D | PL5D | PL6D | PL7D | PL8D | PL9D |       | PL11D | PL12D |
| E | PL1E | PL2E | PL3E | PL4E | PL5E | PL6E | PL7E | PL8E | PL9E |       | PL11E | PL12E |
| F | PL1F | PL2F | PL3F | PL4F | PL5F | PL6F | PL7F | PL8F | PL9F |       | PL11F | PL12F |
| G | PL1G | PL2G | PL3G | PL4G | PL5G | PL6G | PL7G | PL8G | PL9G |       | PL11G | PL12G |
| H | PL1H | PL2H | PL3H | PL4H | PL5H | PL6H | PL7H | PL8H | PL9H |       | PL11H | PL12H |

|   | PL13  | PL14  | PL15  | PL16  | PL17  | PL18  | PL19  | PL20  | PL21  | PL22  | PL23  | PL24  |
|---|-------|-------|-------|-------|-------|-------|-------|-------|-------|-------|-------|-------|
| A | PL13A | PL14A | PL15A | PL16A | PL17A | PL18A | PL19A | PL20A | PL21A | PL22A | PL23A | PL24A |
| B | PL13B | PL14B | PL15B | PL16B | PL17B | PL18B | PL19B | PL20B | PL21B | PL22B | PL23B | PL24B |
| C | PL13C | PL14C | PL15C | PL16C | PL17C | PL18C | PL19C | PL20C | PL21C | PL22C | PL23C | PL24C |
| D | PL13D | PL14D | PL15D | PL16D | PL17D | PL18D | PL19D | PL20D | PL21D | PL22D | PL23D | PL24D |
| E | PL13E | PL14E | PL15E | PL16E | PL17E | PL18E | PL19E | PL20E | PL21E | PL22E | PL23E | PL24E |
| F | PL13F | PL14F | PL15F | PL16F | PL17F | PL18F | PL19F | PL20F | PL21F | PL22F | PL23F | PL24F |
| G | PL13G | PL14G | PL15G | PL16G | PL17G | PL18G | PL19G | PL20G | PL21G | PL22G | PL23G | PL24G |
| H | PL13H | PL14H | PL15H | PL16H | PL17H | PL18H | PL19H | PL20H | PL21H | PL22H | PL23H | PL24H |

|   | PL25  | PL26  | PL27  | PL28  | PL29  | PL30  | PL31  | PL32  | PL33  | PL34  | PL35  | PL36  |
|---|-------|-------|-------|-------|-------|-------|-------|-------|-------|-------|-------|-------|
| A | PL25A | PL26A | PL27A | PL28A | PL29A | PL30A | PL31A | PL32A | PL33A | PL34A | PL35A | PL36A |
| B | PL25B | PL26B | PL27B | PL28B | PL29B | PL30B | PL31B | PL32B | PL33B | PL34B | PL35B | PL36B |
| C | PL25C | PL26C | PL27C | PL28C | PL29C | PL30C | PL31C | PL32C | PL33C | PL34C | PL35C | PL36C |
| D | PL25D | PL26D | PL27D | PL28D | PL29D | PL30D | PL31D | PL32D | PL33D | PL34D | PL35D | PL36D |
| E | PL25E | PL26E | PL27E | PL28E | PL29E | PL30E | PL31E | PL32E | PL33E | PL34E | PL35E | PL36E |
| F | PL25F | PL26F | PL27F | PL28F | PL29F | PL30F | PL31F | PL32F | PL33F | PL34F | PL35F | PL36F |
| G | PL25G | PL26G | PL27G | PL28G | PL29G | PL30G | PL31G | PL32G | PL33G | PL34G | PL35G | PL36G |
| H | PL25H | PL26H | PL27H | PL28H | PL29H | PL30H | PL31H | PL32H | PL33H | PL34H | PL35H | PL36H |

|   | PL37  | PL38  | PL39  | PL40  | PL41  | PL42  |  |  |  |  |  |  |
|---|-------|-------|-------|-------|-------|-------|--|--|--|--|--|--|
| A | PL37A | PL38A | PL39A | PL40A | PL41A | PL42A |  |  |  |  |  |  |
| B | PL37B | PL38B | PL39B | PL40B | PL41B | PL42B |  |  |  |  |  |  |
| C | PL37C | PL38C | PL39C | PL40C | PL41C | PL42C |  |  |  |  |  |  |
| D | PL37D | PL38D |       | PL40D | PL41D | PL42D |  |  |  |  |  |  |
| E | PL37E | PL38E |       | PL40E | PL41E | PL42E |  |  |  |  |  |  |
| F | PL37F | PL38F |       | PL40F | PL41F |       |  |  |  |  |  |  |
| G | PL37G | PL38G |       | PL40G | PL41G |       |  |  |  |  |  |  |
| H | PL37H | PL38H |       | PL40H | PL41H |       |  |  |  |  |  |  |

**Supplementary Figure 5. 96-well plate diagram with subpool ID.** Originally, 3724 individual *Mtb* ORF Clones (Supplementary Table 5) were provided by BEI in 96-well plate format (42 plates in total). In order to facilitate the screening process, every row from an original plate (12 clones) were pooled together as a subpool, indicated above as a plate number combined with a row letter. As an example, “PL1A” subpool stands for the original clone plate 1 row A. Thus, the original 42 plates were minimized to 4 plates (321 subpools) as shown above and used for screening.



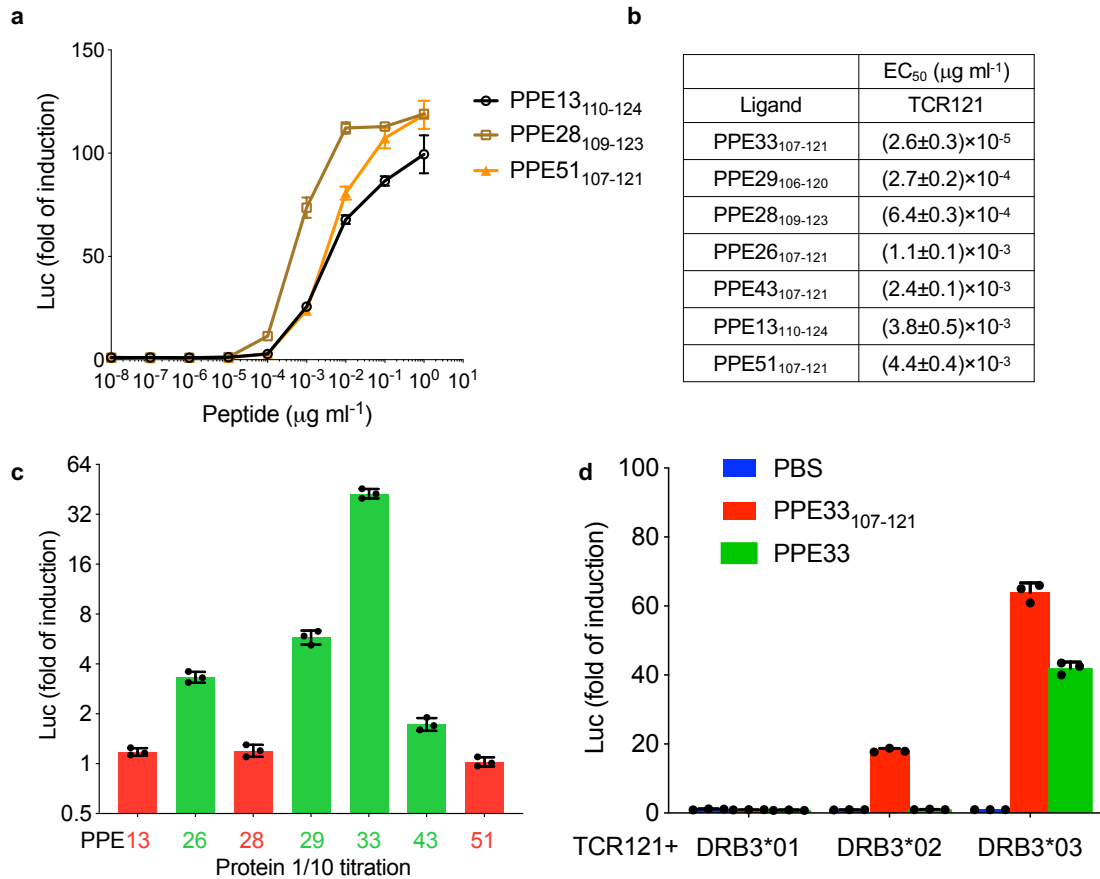

**Supplementary Figure 7. Peptide titration assay for TCR121.** **a**, Dose-dependent response of Group I TCR121 to three PPE peptides containing the “AANR” motif. Mean  $\pm$  s.d. ( $n=3$ , biological replicates) shown. **b**, EC<sub>50</sub> values were determined from dose-response curves and ordered from lowest to highest among 7 PPE peptides that are ubiquitously reactive to TCR121. The average EC<sub>50</sub> value and S.D. for each ligand were calculated from three different experiments. **c**, From PBMC carrying DRB3\*03 allele, monocyte-derived dendritic cells were generated as antigen presenting cell (APC) to activate TCR121 with different PPE family proteins. Green indicating the four positive PPE proteins with known potency and red indicating the three proteins with unknown potency. **d**, Monocyte-derived dendritic cells were generated from three different individuals' PBMC carrying DRB3\*01, DRB3\*02 and DRB3\*03 allele respectively and then used as APC to activate TCR121 with both peptide PPE33<sub>107-121</sub> and the whole PPE33 protein. Mean  $\pm$  s.d. ( $n=3$ , biological replicates) shown.
